# Supplementary material
Source: Springer Nature journal article supplement (https://www.springermedizin.de/resource/supplementary/12916_2008_160_MOESM8_ESM.pdf/9599294)

4T1

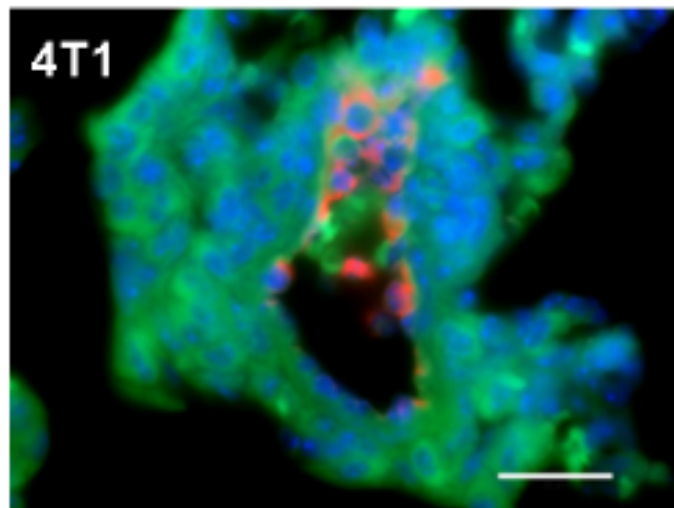

G138R

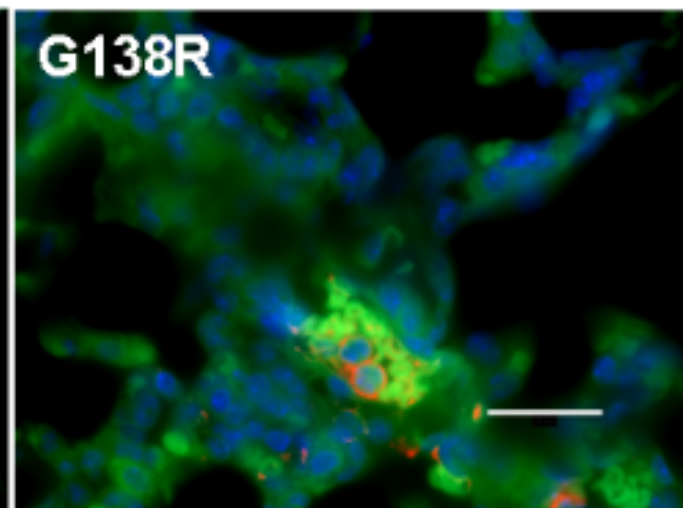

Cx43OE

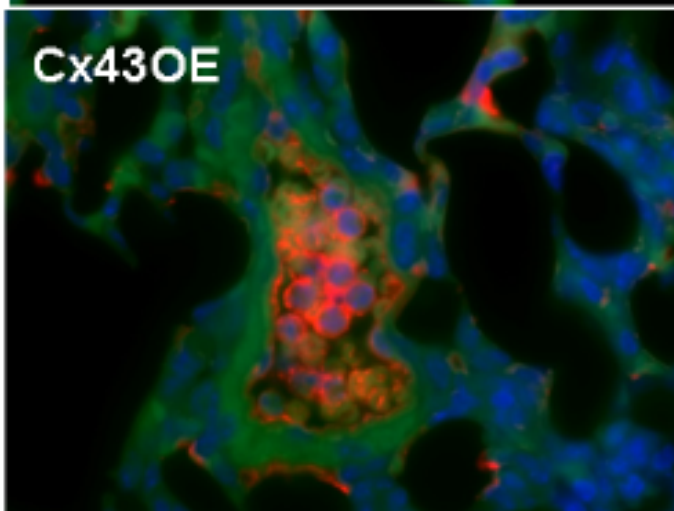

C61S

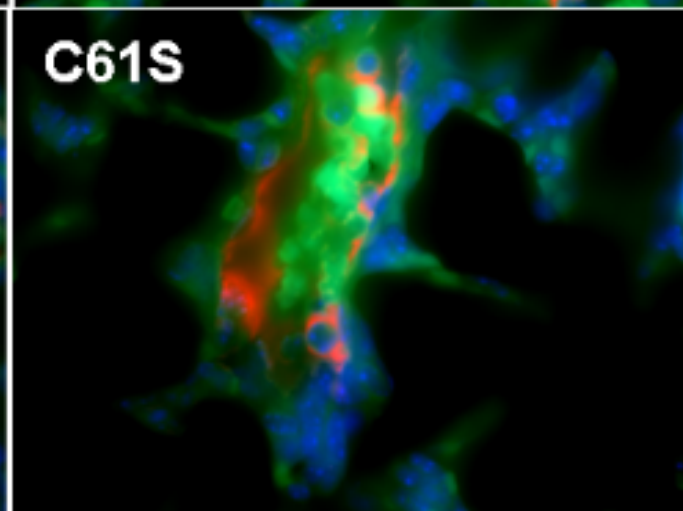

Supplement: MOESM8 [file 9599294]
